# Supplementary material for: Radiological dose reconstruction for birds reconciles outcomes of Fukushima with knowledge of dose-effect relationships
Source: PubMed Central journal article supplement (PMC4645120; doi:10.1038/srep16594), 2015-11-16
Supplement: srep16594-s1.pdf [file srep16594-s1.pdf]

## Radiological dose reconstruction for birds reconciles outcomes of Fukushima with knowledge of dose-effect relationships

by Jacqueline Garnier-Laplace, Karine Beaugelin-Seiller, Claire Della-Vedova, Jean-Michel Métivier, Timothy A. Mousseau, and Anders Pape Møller

### Supporting Information

**Table S1.** Bird species characteristics needed for radiological dose calculations (see equation (2) in the main text)

| Latin name                       | Diet* | Distance to soil (m) | Time on soil | Body mass (g) | Size data**    |                 |
|----------------------------------|-------|----------------------|--------------|---------------|----------------|-----------------|
|                                  |       |                      |              |               | Long axis (cm) | Short axis (cm) |
| <i>Accipiter gentilis</i>        | 1     | 5.00                 | 0.20         | 1024.5        | 35.5           | 7.2             |
| <i>Acrocephalus arundinaceus</i> | 1     | 0.50                 | 1.00         | 30.35         | 12.3           | 2.1             |
| <i>Aegithalos caudatus</i>       | 1     | 3.00                 | 0.10         | 8.8           | 5.0            | 1.8             |
| <i>Alauda arvensis</i>           | 1     | 0.00                 | 1.00         | 36.4          | 11.6           | 2.4             |
| <i>Alcedo atthis</i>             | 1     | 1.00                 | 1.00         | 35.8          | 15.7           | 2.0             |
| <i>Anas poecilorhyncha</i>       | 0     | 0.00                 | 1.00         | 1220          | 48.6           | 6.7             |
| <i>Apus affinis</i>              | 1     | 10.00                | 0.00         | 17.9          | 6.9            | 2.2             |
| <i>Ardea cinerea</i>             | 1     | 0.00                 | 1.00         | 1443          | 75.0           | 5.9             |
| <i>Bambusicola thoracica</i>     | 0     | 0.00                 | 1.00         | 270.25        | 15.8           | 5.5             |
| <i>Butastur indicus</i>          | 1     | 3.00                 | 0.30         | 397           | 23.7           | 5.5             |
| <i>Buteo buteo</i>               | 1     | 3.00                 | 0.30         | 806.5         | 36.5           | 6.3             |
| <i>Carduelis sinica</i>          | 0     | 5.00                 | 0.20         | 31.3          | 8.7            | 2.5             |
| <i>Cettia diphone</i>            | 1     | 1.00                 | 0.05         | 14            | 9.6            | 1.6             |
| <i>Cinclus pallasii</i>          | 1     | 0.00                 | 1.00         | 76            | 14.4           | 3.1             |
| <i>Cisticola juncidis</i>        | 1     | 0.00                 | 1.00         | 8.5           | 6.0            | 1.6             |
| <i>Corvus corone</i>             | 1     | 2.00                 | 0.50         | 544.5         | 27.3           | 6.0             |
| <i>Corvus macrorhynchos</i>      | 1     | 2.00                 | 0.50         | 483           | 34.0           | 5.0             |
| <i>Cuculus canorus</i>           | 1     | 5.00                 | 0.10         | 113           | 19.0           | 3.3             |
| <i>Cuculus poliocephalus</i>     | 1     | 5.00                 | 0.10         | 41            | 16.0           | 2.1             |
| <i>Cuculus saturatus</i>         | 1     | 5.00                 | 0.10         | 96.5          | 17.5           | 3.1             |
| <i>Cyanopica cyanus</i>          | 1     | 5.00                 | 0.10         | 71            | 18.0           | 2.7             |

| Latin name                      | Diet* | Distance to soil (m) | Time on soil | Body mass (g) | Size data** |            |
|---------------------------------|-------|----------------------|--------------|---------------|-------------|------------|
|                                 |       |                      |              |               | Long axis   | Short axis |
|                                 |       |                      |              |               | (cm)        | (cm)       |
| <i>Cyanoptila cyanomelana</i>   | 1     | 5.00                 | 0.05         | 25            | 9.5         | 2.2        |
| <i>Delichon urbica</i>          | 1     | 5.00                 | 0.10         | 19.55         | 6.9         | 2.2        |
| <i>Dendrocopos kizuki</i>       | 1     | 3.00                 | 0.00         | 21.8          | 9.9         | 2.0        |
| <i>Emberiza cioides</i>         | 0     | 1.00                 | 0.90         | 21            | 9.3         | 2.0        |
| <i>Eophona personata</i>        | 0     | 5.00                 | 0.00         | 80            | 11.6        | 3.5        |
| <i>Falco peregrinus</i>         | 1     | 5.00                 | 0.10         | 889.25        | 34.5        | 6.8        |
| <i>Falco tinnunculus</i>        | 1     | 3.00                 | 0.10         | 201.5         | 18.0        | 4.5        |
| <i>Ficedula narcissina</i>      | 1     | 5.00                 | 0.05         | 14            | 6.0         | 2.0        |
| <i>Garrulax garrulax</i>        | 1     | 5.00                 | 0.00         | 116           | 17.0        | 3.5        |
| <i>Garrulus glandarius</i>      | 0     | 5.00                 | 0.10         | 161.7         | 21.0        | 3.7        |
| <i>Hirundo rustica</i>          | 1     | 3.00                 | 0.10         | 19.1          | 9.5         | 1.9        |
| <i>Hypsipetes amaurotis</i>     | 1     | 5.00                 | 0.05         | 85            | 16.5        | 3.0        |
| <i>Lanius bucephalus</i>        | 1     | 3.00                 | 0.50         | 41.75         | 11.3        | 2.6        |
| <i>Milvus migrans</i>           | 1     | 3.00                 | 0.20         | 828.5         | 32.0        | 6.8        |
| <i>Motacilla alba</i>           | 1     | 0.00                 | 1.00         | 20.75         | 9.6         | 2.0        |
| <i>Motacilla cinerea</i>        | 1     | 0.00                 | 1.00         | 17.35         | 8.3         | 1.9        |
| <i>Motacilla grandis</i>        | 1     | 0.00                 | 1.00         | 33            | 15.3        | 2.0        |
| <i>Parus ater</i>               | 1     | 5.00                 | 0.05         | 9.25          | 6.4         | 1.6        |
| <i>Parus major</i>              | 1     | 5.00                 | 0.05         | 18.5          | 7.9         | 2.0        |
| <i>Parus montanus</i>           | 1     | 5.00                 | 0.05         | 11.65         | 5.3         | 2.0        |
| <i>Parus varius</i>             | 1     | 5.00                 | 0.05         | 17            | 8.8         | 1.9        |
| <i>Passer montanus</i>          | 0     | 1.00                 | 0.80         | 21.7          | 8.8         | 2.1        |
| <i>Pericrocotus divaricatus</i> | 1     | 5.00                 | 0.00         | 21.6          | 8.3         | 2.2        |
| <i>Phalacrocorax carbo</i>      | 1     | 0.00                 | 1.00         | 2110          | 76.8        | 7.0        |
| <i>Phasianus colchicus</i>      | 0     | 0.00                 | 1.00         | 1400          | 22.8        | 10.5       |
| <i>Phasianus soemmeringii</i>   | 0     | 0.00                 | 1.00         | 907           | 27.7        | 7.6        |
| <i>Picus awokera</i>            | 1     | 5.00                 | 0.50         | 129           | <b>19.1</b> | 3.5        |
| <i>Regulus regulus</i>          | 1     | 5.00                 | 0.00         | 5.7           | 4.9         | 1.4        |
| <i>Streptopelia orientalis</i>  | 0     | 3.00                 | 0.50         | 214.5         | 20.8        | 4.3        |
| <i>Sturnus cineraceus</i>       | 1     | 1.00                 | 0.50         | 62            | 17.7        | 2.5        |

| Latin name                     | Diet* | Distance to soil (m) | Time on soil | Body mass (g) | Size data**    |                 |
|--------------------------------|-------|----------------------|--------------|---------------|----------------|-----------------|
|                                |       |                      |              |               | Long axis (cm) | Short axis (cm) |
| <i>Tarsiger cyanurus</i>       | 1     | 3.00                 | 0.50         | 12.1          | 8.3            | 1.6             |
| <i>Terpsiphone atrocaudata</i> | 1     | 5.00                 | 0.00         | 18.7          | 18.0           | 1.4             |
| <i>Troglodytes troglodytes</i> | 1     | 5.00                 | 0.20         | 8.9           | 6.9            | 1.5             |
| <i>Turdus cardis</i>           | 1     | 3.00                 | 0.50         | 57.5          | 14.6           | 2.7             |
| <i>Urosphaera squameiceps</i>  | 1     | 1.00                 | 0.10         | 9.5           | 7.6            | 1.5             |
| <i>Zosterops japonica</i>      | 1     | 5.00                 | 0.00         | 10            | 6.6            | 1.6             |

\*0: herbivorous / 1: omnivorous; \*\* based on an equivalent revolution ellipsoid; size estimated from mass and body length, considering a density of 1.07, and a shape defined by a revolution ellipsoid (two axes to determine)

Table S2. Media elementary composition needed for DCCs calculation *via* the EDEN v3 software (Beaugelin-Seiller et al., 2006)

|        | Density              | Mass composition (%) |                     |                      |                     |                      |                      |                      |                      |                      |                      |                     |                      |                      |                     |
|--------|----------------------|----------------------|---------------------|----------------------|---------------------|----------------------|----------------------|----------------------|----------------------|----------------------|----------------------|---------------------|----------------------|----------------------|---------------------|
|        | (g/cm <sup>3</sup> ) | Al                   | Ar                  | C                    | Ca                  | Fe                   | H                    | K                    | Mg                   | N                    | Na                   | O                   | P                    | S                    | Si                  |
| soil   | 1.7 10 <sup>0</sup>  | 7.4 10 <sup>0</sup>  | n.d.                | 1.8 10 <sup>-1</sup> | 3.3 10 <sup>0</sup> | 4.2 10 <sup>0</sup>  | 9.6 10 <sup>-1</sup> | 2.3 10 <sup>0</sup>  | 2.1 10 <sup>0</sup>  | 3.0 10 <sup>-2</sup> | 2.4 10 <sup>0</sup>  | 5.1 10 <sup>1</sup> | 1.1 10 <sup>-1</sup> | 1.1 10 <sup>-1</sup> | 2.6 10 <sup>1</sup> |
| air    | 1.3 10 <sup>-3</sup> | n.d.                 | 1.3 10 <sup>0</sup> | 1.0 10 <sup>-2</sup> | n.d.                | n.d.                 | 6.0 10 <sup>-2</sup> | n.d.                 | n.d.                 | 7.5 10 <sup>1</sup>  | n.d.                 | 2.4 10 <sup>1</sup> | n.d.                 | n.d.                 | n.d.                |
| animal | 1.1 10 <sup>0</sup>  | n.d.                 | n.d.                | 1.9 10 <sup>1</sup>  | 1.4 10 <sup>0</sup> | 1.0 10 <sup>-2</sup> | 9.3 10 <sup>0</sup>  | 2.2 10 <sup>-1</sup> | 4.0 10 <sup>-2</sup> | 5.2 10 <sup>0</sup>  | 2.6 10 <sup>-1</sup> | 6.3 10 <sup>1</sup> | 6.3 10 <sup>-1</sup> | 6.4 10 <sup>-1</sup> | n.d.                |

**Table S3.** DCC estimates ( $\text{Gy}\cdot\text{d}^{-1}$  per  $\text{Bq}\cdot\text{kg}^{-1}$ ) per radionuclide, irradiation pathways and species (adult stage only), weighted assuming factors of 10 for  $\alpha$ -radiation, 3 for low- $\beta$  radiation ( $E < 10$  keV), and 1 for other  $\beta$ -radiation and  $\gamma$ -radiation. The characteristics of the exposure scenes used for DCC calculation are as follows: for birds allocating their time-budget between soil and air: adult bird on soil, and adult bird in air at a given distance to soil as indicated in Table S1, with an occupancy factor for each scene (always the long axis parallel to the soil, to maximize the exposure); some birds live always on soil (time on soil=1 in Table S1), some others never come on soil (time on soil=0 in Table S1). Use  $1 \text{ Gy d}^{-1} = 4.17 \times 10^4 \mu\text{Gy h}^{-1}$  in case conversion is needed.

|                                  | internal exposure  |                   |                  | external exposure to soil - contact |                   |                  | external exposure to soil - distance |                   |                  |
|----------------------------------|--------------------|-------------------|------------------|-------------------------------------|-------------------|------------------|--------------------------------------|-------------------|------------------|
|                                  | $^{137}\text{Cs}+$ | $^{134}\text{Cs}$ | $^{131}\text{I}$ | $^{137}\text{Cs}+$                  | $^{134}\text{Cs}$ | $^{131}\text{I}$ | $^{137}\text{Cs}+$                   | $^{134}\text{Cs}$ | $^{131}\text{I}$ |
| <i>Accipiter gentilis</i>        | 9.54E-09           | 6.65E-09          | 7.07E-09         | 2.04E-09                            | 2.42E-09          | 2.10E-09         | 6.70E-10                             | 1.91E-09          | 3.09E-10         |
| <i>Acrocephalus arundinaceus</i> | 9.54E-09           | 6.65E-09          | 7.07E-09         | 7.72E-11                            | 2.18E-10          | 4.04E-11         | 7.33E-10                             | 2.37E-09          | 3.76E-10         |
| <i>Aegithalos caudatus</i>       | 9.43E-09           | 6.49E-09          | 7.01E-09         | 7.96E-11                            | 2.22E-10          | 4.32E-11         | 9.75E-10                             | 2.77E-09          | 4.88E-10         |
| <i>Alauda arvensis</i>           | 9.61E-09           | 6.76E-09          | 7.11E-09         | 6.49E-10                            | 6.21E-10          | 5.87E-10         | No exposure at distance              |                   |                  |
| <i>Alcedo atthis</i>             | 9.51E-09           | 6.63E-09          | 7.06E-09         | 7.55E-11                            | 2.12E-10          | 3.97E-11         | 8.11E-10                             | 2.50E-09          | 4.27E-10         |
| <i>Anas poecilorhyncha</i>       | 1.03E-08           | 8.21E-09          | 7.53E-09         | 3.17E-10                            | 5.47E-10          | 2.59E-10         | No exposure at distance              |                   |                  |
| <i>Apus affinis</i>              | 9.54E-09           | 6.65E-09          | 7.08E-09         | 1.20E-09                            | 1.03E-09          | 1.12E-09         | 8.82E-10                             | 2.48E-09          | 4.50E-10         |
| <i>Ardea cinerea</i>             | 1.02E-08           | 7.99E-09          | 7.47E-09         | 2.81E-10                            | 4.96E-10          | 2.27E-10         | No exposure at distance              |                   |                  |
| <i>Bambusicola thoracica</i>     | 1.01E-08           | 7.71E-09          | 7.40E-09         | 5.65E-10                            | 7.92E-10          | 5.46E-10         | No exposure at distance              |                   |                  |
| <i>Butastur indicus</i>          | 1.01E-08           | 7.78E-09          | 7.42E-09         | 4.71E-10                            | 6.69E-10          | 4.48E-10         | 7.40E-10                             | 2.12E-09          | 3.49E-10         |
| <i>Buteo buteo</i>               | 1.02E-08           | 8.06E-09          | 7.49E-09         | 3.38E-10                            | 5.84E-10          | 2.77E-10         | 6.92E-10                             | 1.99E-09          | 3.22E-10         |
| <i>Carduelis sinica</i>          | 9.61E-09           | 6.77E-09          | 7.12E-09         | 7.47E-10                            | 6.90E-10          | 6.83E-10         | 9.37E-10                             | 2.64E-09          | 4.62E-10         |
| <i>Cettia diphone</i>            | 9.40E-09           | 6.45E-09          | 6.99E-09         | 7.57E-11                            | 2.11E-10          | 4.10E-11         | 8.39E-10                             | 2.58E-09          | 4.44E-10         |
| <i>Cinclus pallasii</i>          | 9.74E-09           | 7.01E-09          | 7.19E-09         | 4.44E-10                            | 4.83E-10          | 3.89E-10         | No exposure at distance              |                   |                  |
| <i>Cisticola juncidis</i>        | 9.38E-09           | 6.43E-09          | 6.99E-09         | 7.76E-11                            | 2.15E-10          | 4.28E-11         | No exposure at distance              |                   |                  |
| <i>Corvus corone</i>             | 1.02E-08           | 7.94E-09          | 7.46E-09         | 4.41E-10                            | 6.62E-10          | 4.08E-10         | 6.76E-10                             | 1.98E-09          | 3.16E-10         |
| <i>Corvus macrorhynchos</i>      | 1.00E-08           | 7.66E-09          | 7.38E-09         | 4.38E-10                            | 6.41E-10          | 4.08E-10         | 7.20E-10                             | 2.10E-09          | 3.40E-10         |
| <i>Cuculus canorus</i>           | 9.78E-09           | 7.09E-09          | 7.22E-09         | 4.28E-10                            | 4.83E-10          | 3.70E-10         | 8.77E-10                             | 2.48E-09          | 4.26E-10         |
| <i>Cuculus poliocephalus</i>     | 9.54E-09           | 6.66E-09          | 7.08E-09         | 7.34E-11                            | 2.06E-10          | 3.87E-11         | 9.56E-10                             | 2.69E-09          | 4.71E-10         |
| <i>Cuculus saturatus</i>         | 9.61E-09           | 6.77E-09          | 7.12E-09         | 7.47E-10                            | 6.90E-10          | 6.83E-10         | 9.37E-10                             | 2.64E-09          | 4.62E-10         |
| <i>Cyanopica cyanus</i>          | 9.68E-09           | 6.89E-09          | 7.15E-09         | 5.80E-10                            | 5.75E-10          | 5.19E-10         | 9.14E-10                             | 2.58E-09          | 4.48E-10         |
| <i>Cyanoptila cyanomelana</i>    | 9.56E-09           | 6.68E-09          | 7.08E-09         | 7.65E-11                            | 2.16E-10          | 4.01E-11         | 9.56E-10                             | 2.68E-09          | 4.71E-10         |
| <i>Delichon urbica</i>           | 9.54E-09           | 6.65E-09          | 7.08E-09         | 3.64E-10                            | 4.16E-10          | 3.17E-10         | 9.56E-10                             | 2.70E-09          | 4.75E-10         |
| <i>Dendrocopos kizuki</i>        | 9.50E-09           | 6.60E-09          | 7.06E-09         | 7.65E-11                            | 2.15E-10          | 4.04E-11         | 9.56E-10                             | 2.70E-09          | 4.73E-10         |
| <i>Emberiza cioides</i>          | 9.50E-09           | 6.60E-09          | 7.06E-09         | 7.68E-11                            | 2.17E-10          | 4.06E-11         | 8.16E-10                             | 2.51E-09          | 4.30E-10         |
| <i>Eophona personata</i>         | 9.80E-09           | 7.11E-09          | 7.23E-09         | 2.90E-10                            | 3.79E-10          | 2.39E-10         | 8.74E-10                             | 2.47E-09          | 4.25E-10         |
| <i>Falco peregrinus</i>          | 1.03E-08           | 8.20E-09          | 7.53E-09         | 3.16E-10                            | 5.38E-10          | 2.62E-10         | 6.88E-10                             | 1.96E-09          | 3.19E-10         |

|                                 | internal exposure  |                   |                  | external exposure to soil - contact |                   |                  | external exposure to soil - distance |                   |                  |
|---------------------------------|--------------------|-------------------|------------------|-------------------------------------|-------------------|------------------|--------------------------------------|-------------------|------------------|
|                                 | <sup>137</sup> Cs+ | <sup>134</sup> Cs | <sup>131</sup> I | <sup>137</sup> Cs+                  | <sup>134</sup> Cs | <sup>131</sup> I | <sup>137</sup> Cs+                   | <sup>134</sup> Cs | <sup>131</sup> I |
| <i>Falco tinnunculus</i>        | 9.81E-09           | 7.15E-09          | 7.24E-09         | 4.96E-10                            | 7.38E-10          | 4.57E-10         | 8.50E-10                             | 2.42E-09          | 4.13E-10         |
| <i>Ficedula narcissina</i>      | 9.49E-09           | 6.57E-09          | 7.05E-09         | 7.68E-11                            | 2.16E-10          | 4.13E-11         | 9.75E-10                             | 2.74E-09          | 4.84E-10         |
| <i>Garrulax garrulax</i>        | 9.81E-09           | 7.15E-09          | 7.24E-09         | 3.31E-10                            | 4.14E-10          | 2.76E-10         | 8.67E-10                             | 2.45E-09          | 4.20E-10         |
| <i>Garrulus glandarius</i>      | 9.85E-09           | 7.23E-09          | 7.26E-09         | 3.28E-10                            | 4.42E-10          | 2.65E-10         | 8.52E-10                             | 2.41E-09          | 4.12E-10         |
| <i>Hirundo rustica</i>          | 9.47E-09           | 6.56E-09          | 7.04E-09         | 7.74E-11                            | 2.18E-10          | 4.10E-11         | 9.56E-10                             | 2.72E-09          | 4.77E-10         |
| <i>Hypsipetes amaurotis</i>     | 9.72E-09           | 6.98E-09          | 7.19E-09         | 3.92E-10                            | 4.55E-10          | 3.37E-10         | 8.97E-10                             | 2.53E-09          | 4.38E-10         |
| <i>Lanius bucephalus</i>        | 9.65E-09           | 6.82E-09          | 7.13E-09         | 1.97E-10                            | 4.57E-10          | 1.10E-10         | 9.13E-10                             | 2.59E-09          | 4.49E-10         |
| <i>Milvus migrans</i>           | 1.03E-08           | 8.19E-09          | 7.53E-09         | 3.13E-10                            | 5.71E-10          | 2.44E-10         | 6.72E-10                             | 1.94E-09          | 3.11E-10         |
| <i>Motacilla alba</i>           | 9.50E-09           | 6.61E-09          | 7.06E-09         | 7.43E-11                            | 2.09E-10          | 3.94E-11         | No exposure at distance              |                   |                  |
| <i>Motacilla cinerea</i>        | 9.47E-09           | 6.56E-09          | 7.04E-09         | 7.48E-11                            | 2.11E-10          | 4.00E-11         | No exposure at distance              |                   |                  |
| <i>Motacilla grandis</i>        | 9.51E-09           | 6.63E-09          | 7.06E-09         | 7.70E-11                            | 2.16E-10          | 4.04E-11         | No exposure at distance              |                   |                  |
| <i>Parus ater</i>               | 9.38E-09           | 6.43E-09          | 6.99E-09         | 7.79E-11                            | 2.18E-10          | 4.24E-11         | 9.94E-10                             | 2.80E-09          | 4.97E-10         |
| <i>Parus major</i>              | 9.50E-09           | 6.59E-09          | 7.06E-09         | 7.79E-11                            | 2.20E-10          | 4.12E-11         | 9.66E-10                             | 2.72E-09          | 4.80E-10         |
| <i>Parus montanus</i>           | 9.48E-09           | 6.56E-09          | 7.04E-09         | 7.75E-11                            | 2.18E-10          | 4.17E-11         | 9.75E-10                             | 2.74E-09          | 4.85E-10         |
| <i>Parus varius</i>             | 9.47E-09           | 6.56E-09          | 7.04E-09         | 7.67E-11                            | 2.16E-10          | 4.08E-11         | 9.75E-10                             | 2.74E-09          | 4.83E-10         |
| <i>Passer montanus</i>          | 9.53E-09           | 6.64E-09          | 7.07E-09         | 7.64E-11                            | 2.16E-10          | 4.03E-11         | 8.13E-10                             | 2.50E-09          | 4.27E-10         |
| <i>Pericrocotus divaricatus</i> | 9.55E-09           | 6.67E-09          | 7.08E-09         | 1.13E-09                            | 9.46E-10          | 1.06E-09         | 9.56E-10                             | 2.69E-09          | 4.73E-10         |
| <i>Phalacrocorax carbo</i>      | 1.03E-08           | 8.32E-09          | 7.56E-09         | 2.83E-10                            | 5.42E-10          | 2.09E-10         | No exposure at distance              |                   |                  |
| <i>Phasianus colchicus</i>      | 1.06E-08           | 9.04E-09          | 7.76E-09         | 2.47E-10                            | 3.43E-10          | 6.09E-11         | No exposure at distance              |                   |                  |
| <i>Phasianus soemmeringii</i>   | 1.03E-08           | 8.38E-09          | 7.58E-09         | 2.76E-10                            | 3.81E-10          | 7.78E-11         | No exposure at distance              |                   |                  |
| <i>Picus awokera</i>            | 9.82E-09           | 7.16E-09          | 7.24E-09         | 1.92E-10                            | 3.25E-10          | 1.40E-10         | 8.65E-10                             | 2.44E-09          | 4.19E-10         |
| <i>Regulus regulus</i>          | 9.30E-09           | 6.34E-09          | 6.95E-09         | 7.87E-11                            | 2.18E-10          | 4.35E-11         | 1.01E-09                             | 2.84E-09          | 5.06E-10         |
| <i>Streptopelia orientalis</i>  | 9.93E-09           | 7.41E-09          | 7.31E-09         | 3.72E-10                            | 5.61E-10          | 3.38E-10         | 8.03E-10                             | 2.30E-09          | 3.85E-10         |
| <i>Sturnus cineraceus</i>       | 9.63E-09           | 6.82E-09          | 7.13E-09         | 7.29E-10                            | 6.70E-10          | 6.66E-10         | 7.80E-10                             | 2.41E-09          | 4.07E-10         |
| <i>Tarsiger cyanurus</i>        | 9.39E-09           | 6.44E-09          | 6.99E-09         | 7.64E-11                            | 2.13E-10          | 4.14E-11         | 9.85E-10                             | 2.78E-09          | 4.90E-10         |
| <i>Terpsiphone atrocaudata</i>  | 9.33E-09           | 6.37E-09          | 6.96E-09         | 1.09E-09                            | 9.13E-10          | 1.02E-09         | 1.00E-09                             | 2.81E-09          | 5.00E-10         |
| <i>Troglodytes troglodytes</i>  | 9.35E-09           | 6.40E-09          | 6.97E-09         | 7.75E-11                            | 2.16E-10          | 4.24E-11         | 1.00E-09                             | 2.81E-09          | 5.00E-10         |
| <i>Turdus cardis</i>            | 9.67E-09           | 6.88E-09          | 7.15E-09         | 5.28E-10                            | 5.38E-10          | 4.71E-10         | 9.02E-10                             | 2.57E-09          | 4.43E-10         |
| <i>Urosphaera squameiceps</i>   | 9.35E-09           | 6.40E-09          | 6.97E-09         | 7.70E-11                            | 2.14E-10          | 4.20E-11         | 8.48E-10                             | 2.60E-09          | 4.49E-10         |
| <i>Zosterops japonica</i>       | 9.38E-09           | 6.43E-09          | 6.99E-09         | 7.74E-11                            | 2.15E-10          | 4.24E-11         | 9.94E-10                             | 2.80E-09          | 4.97E-10         |

**Table S4.** Aggregated Concentration Ratios (Bq/kg w.w. whole body per Bq/kg d.w soil) for cesium and iodine. For cesium, the value was attributed to bird species according to their diet, except for a limited number of species where species-specific data were available or when the species-specific data could be extrapolated from a species of the “same genus and diet” for which CR values exist. For iodine the same value was applied to all species since there is no specific data in the literature except the value proposed in the ERICA database for vertebrates.

| Species or group of species                                        | Extrapolation rules                                     | Aggregated CR | Type of values and number of data | Reference                                       |
|--------------------------------------------------------------------|---------------------------------------------------------|---------------|-----------------------------------|-------------------------------------------------|
| <b>Cesium</b>                                                      |                                                         |               |                                   |                                                 |
| <b>Herbivorous birds<sup>1</sup></b>                               | Same diet                                               | 1             | Arithmetic mean of 57 data        | IAEA (2014) <sup>3</sup>                        |
| <b>Omnivorous birds<sup>2</sup></b>                                | Same diet                                               | 0.57          | Arithmetic mean of 79 data        | IAEA (2014)                                     |
| <i>Anas poecilorhyncha</i>                                         | Same genus and diet as <i>Anas platyrhynchos</i>        | 0.095         | Arithmetic mean of 2 data         | Extracted from the WTD <sup>4</sup>             |
| <i>Accipiter gentilis</i>                                          | Same species                                            | 0.0926        | 1 datum                           | Extracted from the WTD                          |
| <i>Hirundo rustica</i>                                             | Same species                                            | 0.081         | 1 datum                           | Extracted from the WTD                          |
| <i>Lanius bucephalus</i>                                           | Same diet and genus as <i>Lanius collurio</i>           | 0.488         | Arithmetic mean of 2 data         | Extracted from the WTD                          |
| <i>Parus ater</i> , <i>Parus montanus</i> ,<br><i>Parus varius</i> | Same diet and genus as <i>Parus major</i>               | 0.559         |                                   |                                                 |
| <i>Parus major</i>                                                 | Same species                                            | 0.559         | Arithmetic mean of 26 data        | Extracted from the WTD                          |
| <i>Turdus cardis</i>                                               | Same diet and genus as <i>Turdus pilaris</i>            | 0.0517        | Arithmetic mean of 3 data         | Extracted from the WTD                          |
| <i>Sturnus cineraceus</i>                                          | Same diet and genus as <i>Sturnus vulgaris</i>          | 0.174         | 1 datum                           | Extracted from the WTD                          |
| <b>Iodine</b>                                                      |                                                         |               |                                   |                                                 |
| All species                                                        | Same as vertebrates (a model derived value for mammals) | 0.4           | No information                    | ERICA tool v1.2, Nov 2014<br>www.ERICA-tool.com |

<sup>1</sup> *Bambusicola thoracica*, *Carduelis sinica*, *Emberiza cioides*, *Eophona personata*, *Garrulus glandarius*, *Phasianus colchicus*, *Phasianus soemmeringii*, *Streptopelia orientalis*

<sup>2</sup> *Accipiter gentilis*, *Acrocephalus arundinaceus*, *Aegithalos caudatus*, *Alauda arvensis*, *Alcedo atthis*, *Apus affinis*, *Ardea cinerea*, *Butastur indicus*, *Buteo buteo*, *Cettia diphone*, *Cinclus pallasii*, *Cisticola juncidis*, *Corvus corone*, *Corvus macrorhynchos*, *Cuculus canorus*, *Cuculus poliocephalus*, *Cuculus saturates*, *Cyanopica cyanus*, *Cyanoptila cyanomelana*, *Delichon urbica*, *Dendrocopos kizuki*, *Falco peregrinus*, *Falco tinnunculus*, *Ficedula narcissina*, *Garrulax garrulax*, *Hypsipetes amaurotis*, *Milvus migrans*, *Motacilla alba*, *Motacilla cinerea*, *Motacilla grandis*, *Passer montanus*, *Pericocotus divaricatus*, *Phalacrocorax carbo*, *Picus awokera*, *Regulus regulus*, *Tarsiger cyanurus*, *Terpsiphone atrocaudata*, *Troglodytes troglodytes*, *Urosphaera squameiceps*, *Zosterops japonica*

<sup>3</sup> IAEA (2014). Handbook of parameter values for the prediction of radionuclide transfers to wildlife. Technical Report Series n°479, Vienna, 218 pages.

<sup>4</sup> Extracted from the wildlife transfer database (WTD; www.wildlifetransferdatabase.org) version as described by Copplestone, D., Beresford, N.A., Brown, J., Yankovich, T. 2013. An international database of radionuclide Concentration Ratios for wildlife: development and uses. J. Environ. Radioact. 126, 288-298. <http://dx.doi.org/10.1016/j.jenvrad.2013.05.007>

**Table S5.** Pearson correlation matrix of raw possible explanatory variables. Pearson correlation coefficient  $\geq |0.85|$  are highlighted in bold.

|             | Total dose | Time  | Cloud cover | Temperature | Wind  | Altitude | Grass | Bush         | Tree         | Farmland     | Deciduous | Coniferous |
|-------------|------------|-------|-------------|-------------|-------|----------|-------|--------------|--------------|--------------|-----------|------------|
| Total dose  | 1.00       |       |             |             |       |          |       |              |              |              |           |            |
| Time        | -0.09      | 1.00  |             |             |       |          |       |              |              |              |           |            |
| Cloud cover | 0.19       | 0.31  | 1.00        |             |       |          |       |              |              |              |           |            |
| Temp        | -0.28      | 0.38  | -0.03       | 1.00        |       |          |       |              |              |              |           |            |
| Wind        | -0.15      | 0.00  | 0.08        | -0.06       | 1.00  |          |       |              |              |              |           |            |
| Altitude    | 0.13       | 0.17  | 0.13        | 0.09        | -0.23 | 1.00     |       |              |              |              |           |            |
| Grass       | -0.03      | 0.04  | 0.04        | 0.00        | -0.07 | 0.22     | 1.00  |              |              |              |           |            |
| Bush        | 0.40       | -0.08 | 0.07        | -0.01       | -0.07 | 0.28     | 0.09  | 1.00         |              |              |           |            |
| Tree        | 0.43       | -0.04 | 0.08        | -0.01       | -0.13 | 0.35     | 0.10  | <b>0.92</b>  | 1.00         |              |           |            |
| Farmland    | -0.40      | 0.11  | -0.03       | 0.01        | 0.05  | -0.22    | 0.11  | <b>-0.90</b> | <b>-0.87</b> | 1.00         |           |            |
| Deciduous   | 0.43       | -0.04 | 0.08        | -0.01       | -0.13 | 0.34     | 0.09  | <b>0.92</b>  | 1.00         | <b>-0.87</b> | 1.00      |            |
| Coniferous  | 0.02       | 0.00  | 0.00        | 0.02        | 0.01  | 0.10     | 0.03  | 0.10         | 0.13         | -0.10        | 0.07      | 1.00       |

**Table S6.** AIC of GLMM (used to study Total number of birds) and LMM (used to study Simpson's index of diversity) containing different random effect structures. Fixed effects are the same (i.e  $\log_{10}$  Total dose, Time, Time<sup>2</sup>, Cloud cover, Temperature, Wind, Altitude, Grass, Farmland, Coniferous). CensDay is the census day ( i.e combination of Year and Date factors). CensDayTra is the combination of modalities of Census Day and Transect factors. The lowest AIC are highlighted in bold.

| <u>Random effect structure</u>  | <u>AIC</u>                   |                                     |
|---------------------------------|------------------------------|-------------------------------------|
|                                 | <u>Total Number of Birds</u> | <u>Simpson's Index of Diversity</u> |
| no random effect                | 5763.43                      | -732.18                             |
| 1 Year                          | 5958.63                      | -728.29                             |
| 1 Site                          | 5772.62                      | -737.83                             |
| 1 Transect                      | 5945.18                      | -759.28                             |
| 1 CensDay                       | 5924.98                      | -736.70                             |
| 1 CensDayTra                    | 5898.54                      | -754.34                             |
| 1 Year + 1 Site                 | 5766.86                      | -736.10                             |
| 1 Year + 1 Transect             | 5939.85                      | -762.28                             |
| 1 Site + 1 Transect             | 5770.70                      | -762.52                             |
| 1 Site + 1 CensDay              | 5734.57                      | -743.79                             |
| 1 Site + 1 CensDayTra           | <b>5728.78</b>               | -759.15                             |
| 1 Transect + 1 CensDay          | 5906.67                      | -764.18                             |
| 1 Site + 1 Transect + 1 CensDay | 5732.89                      | <b>-768.61</b>                      |



**Table S7.** Algorithm used to estimate  $ED_{50}$  from the fitted GLMM dose-response relationship between total dose (TD) and total number of birds (TNB).

|                                                                                                                                                                                                                                                                                                                                                                                                                                                                                                                                                                                                                                                                                                                                                                                                                                                                                                                                                                                                                                                                                                                                                                                                                                                                                                                                                                                                                                                                                                                                                                                                                                                                                                                                                                                                                                            |
|--------------------------------------------------------------------------------------------------------------------------------------------------------------------------------------------------------------------------------------------------------------------------------------------------------------------------------------------------------------------------------------------------------------------------------------------------------------------------------------------------------------------------------------------------------------------------------------------------------------------------------------------------------------------------------------------------------------------------------------------------------------------------------------------------------------------------------------------------------------------------------------------------------------------------------------------------------------------------------------------------------------------------------------------------------------------------------------------------------------------------------------------------------------------------------------------------------------------------------------------------------------------------------------------------------------------------------------------------------------------------------------------------------------------------------------------------------------------------------------------------------------------------------------------------------------------------------------------------------------------------------------------------------------------------------------------------------------------------------------------------------------------------------------------------------------------------------------------|
| <p>A. Split the set of calculated Total Dose into 9 doses interval, created by geometric progression from min (Total Dose), to max (Total Dose).<br/>Let <math>I_i</math> denote the <math>i^{\text{th}}</math> interval</p> <p>B. For <math>i=1</math> to 9 :</p> <p>    1. Randomly select 5 Total Doses into <math>I_i</math>. Let <math>TD_{ij}</math> denotes the <math>j^{\text{th}}</math> selected dose of the <math>i^{\text{th}}</math> interval.</p> <p>        a. For <math>j = 1</math> to 5 :</p> <p>            i) use <i>predictSE</i> function implemented in <i>AICcmodavg</i> package<sup>S1</sup> to estimate an ‘average’ TNB, denoted <math>A\_TNB_{ij}</math> and it’s standard error, denoted <math>SE\_TNB_{ij}</math></p> <p>            ii) generate a ‘random’ TNB, denoted <math>R\_TNB_{ij}</math>, from Gaussian distribution <math>\mathcal{N}(A\_TNB_{ij}, SE\_TNB_{ij})</math></p> <p>C. Using <i>drm</i> function of <i>drc</i> package<sup>S2</sup>, fit a five-parameter log-logistic model to the <math>(TD_{ij}; R\_TNB_{ij})</math> data, forcing to pass by the pair <math>(TD=0.0012^*; TNB=8)</math>, and fixing the highest and lowest limits of the curve, respectively to 8 and 0.</p> <p>D. Estimate <math>ED_{50}</math> from the fit using <i>ED</i> function of <i>drc</i> package</p> <p>E. Use bootstrap approach to estimate 95% confidence interval to the derived <math>ED_{50}</math> , redoing step B to D a large amount of times (here 4999) and using the 2.5<sup>th</sup> and 97.5<sup>th</sup> percentiles of the 4999 obtained values.</p> <p>*0.0012 Gy is the background reference level reported for bird-type organism 0.01 mGy <math>d^{-1}</math> by ICRP 108<sup>21</sup> multiplied by 1208 days which is the maximum exposure duration of birds in this study.</p> |
|--------------------------------------------------------------------------------------------------------------------------------------------------------------------------------------------------------------------------------------------------------------------------------------------------------------------------------------------------------------------------------------------------------------------------------------------------------------------------------------------------------------------------------------------------------------------------------------------------------------------------------------------------------------------------------------------------------------------------------------------------------------------------------------------------------------------------------------------------------------------------------------------------------------------------------------------------------------------------------------------------------------------------------------------------------------------------------------------------------------------------------------------------------------------------------------------------------------------------------------------------------------------------------------------------------------------------------------------------------------------------------------------------------------------------------------------------------------------------------------------------------------------------------------------------------------------------------------------------------------------------------------------------------------------------------------------------------------------------------------------------------------------------------------------------------------------------------------------|

<sup>S1</sup>. Mazerolle, M.J. *AICcmodavg*: Model selection and multimodel inference based on (Q)AIC(c). R package version 2.0-3. <http://cran.r-project.org/web/packages/AICcmodavg/>, Accessed 2 June, 2015.

<sup>S2</sup>. Ritz, C. & Streibig, J. C. *Bioassay Analysis using R*. J. Statist. Software, Vol 12, Issue 5. R package version 2.5-12. <http://cran.r-project.org/web/packages/drc/> (2005)
